# Supplementary material for: Oriented growth of a single crystalline Cu(111) flake synthesized by pyrolysis of coordination polymer [(CuBr)2(bpy)]n (bpy = 2,2′-bipyridine)
Source: Royal Society of Chemistry journal article supplement (doi:10.1039/b819813f), 2009-01-01
Supplement: b819813f.pdf [file b819813f.pdf]

Table S1. Selected bond lengths (Å) and angles (deg.) of  $[(\text{CuBr})_2(\text{bpy})]_n$  (bpy=2,2'-bipyridine)

|                    |            |
|--------------------|------------|
| Br(1)-Cu(1)        | 2.6350(10) |
| Br(1)-Cu(2)        | 2.3511(12) |
| Br(1)-Cu(1B)       | 2.3343(9)  |
| Br(2)-Cu(2)        | 2.3887(12) |
| Br(2)-Cu(2A)       | 2.3532(11) |
| Cu(1)-N(1)         | 2.018(4)   |
| Cu(1)-N(2)         | 2.066(5)   |
| Cu(1)-Br(1A)       | 2.3343(9)  |
| Cu(2)-Br(2B)       | 2.3532(11) |
| Cu(2)-Br(1)-Cu(1)  | 95.92(3)   |
| Cu(1)B-Br(1)-Cu(1) | 103.41(3)  |
| Cu(1)B-Br(1)-Cu(2) | 89.89(3)   |
| Cu(2A)-Br(2)-Cu(2) | 110.85(5)  |
| N(1)-Cu(1)-N(2)    | 80.91(17)  |
| N(1)-Cu(1)-Br(1)   | 104.51(12) |
| N(2)-Cu(1)-Br(1)   | 101.16(13) |
| N(1)-Cu(1)-Br(1A)  | 139.47(12) |
| N(2)-Cu(1)-Br(1A)  | 121.36(12) |
| Br(1A)-Cu(1)-Br(1) | 103.41(3)  |
| Br(1)-Cu(2)-Br(2)  | 120.13(4)  |

A = (1+x,y,z); B = (-1+x,y,z)
